# Supplementary material for: ROS homeostasis mediated by MPK4 and SUMM2 determines synergid cell death
Source: PubMed Central journal article supplement (PMC8976062; doi:10.1038/s41467-022-29373-7), 2022-04-01
Supplement: 41467_2022_29373_MOESM1_ESM.pdf [file 41467_2022_29373_MOESM1_ESM.pdf]

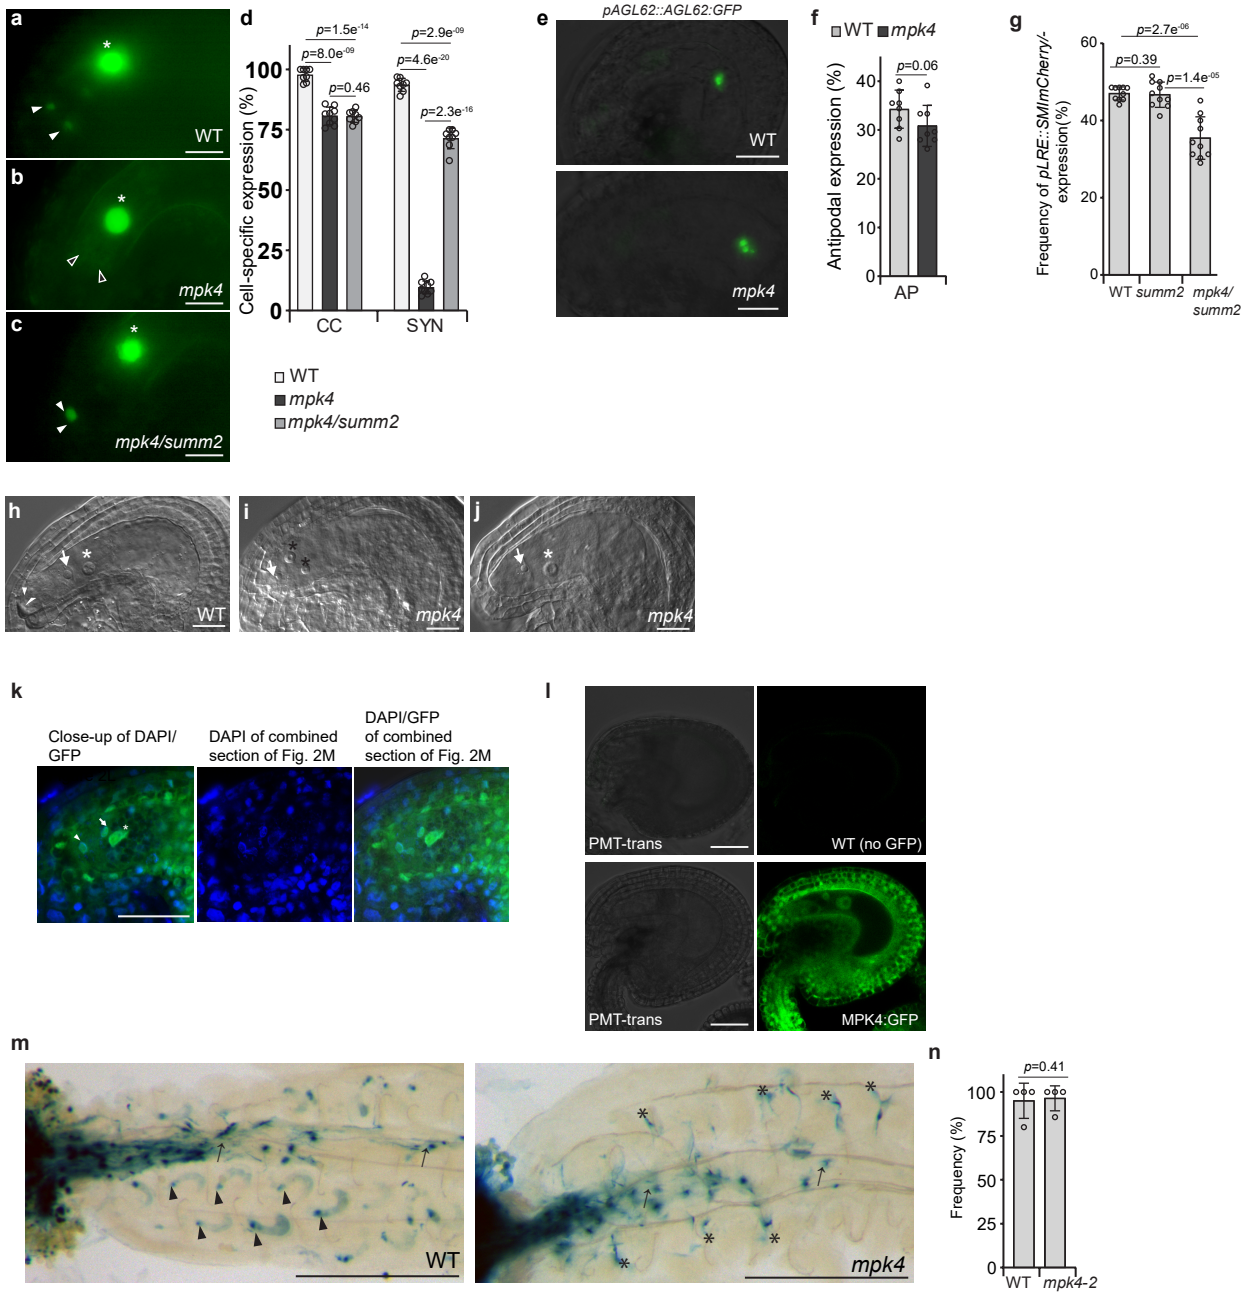

Supplementary Figure 1

**Supplementary Figure 1. Characterization of the premature synergid degeneration and the MPK4:GFP localization**

**a-d** Localization (a-c) and quantification (d) of the female gametophyte reporter *pHD2B::GFP:HD2B/+* in WT (n=263), *mpk4* (n=310) and *mpk4/summ2* (n=283). Error bars show  $\pm$  SD.

**e-f** Localization and occurrence of the antipodal marker *pAGL62::AGL62:GFP/-* (WT, n=249; *mpk4*, n=195). Error bars show  $\pm$  SD. White arrowhead, synergid; black arrowhead, degenerating synergid; white arrow, egg cell; white asterisk, central cell nucleus; Scale bars, 20  $\mu$ m

**g** Frequency of *pLRE::SMImCherry/-* expression in WT (n=338), *summ2* (n=332) and *mpk4/summ2* (n=314). See also **Figure 4o-p**. Error bars show  $\pm$  SD.

**h-j** Differential-contrast microscopy of WT (h) and *mpk4* (i-j) female gametophyte. Representative images are depicted of three biological replicates. Scale bars, 20  $\mu$ m.

**k** MPK4:GFP localization in synergid, egg cell, CC and sporophytic ovule tissue, co-localized with the nuclei staining dye 4',6-diamidino-2-phenylindole DAPI, **also see Figure 2n**. Scale bars, 20  $\mu$ m

**l** Evaluation of MPK4:GFP signal intensity against a WT control without carrying a GFP-reporter.

**m-n** GUS-stained PT tracking through the transmitting tract in WT and *mpk4*. Flowers of WT and *mpk4* were pollinated with *pLAT52::GUS*-expressing pollen and the growth of the PT within the maternal tissue was evaluated after 24 hours. Images show regular growth of the PT in the transmitting tract/ pistil in WT and *mpk4*, yet, ovule-targeting in *mpk4* is affected (Black asterisk). Black arrowhead, PT-arrival and burst in the FG; black arrow, PT in the transmitting tract of the pistil. Shown are the results of 4 biological replicates. Error bars show  $\pm$  SD.

Statistical significance was analyzed by one-way ANOVA. Source data and further statistical analysis are provided in the source data file.



**a** FG4-FG5

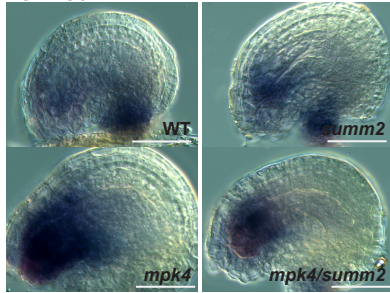

**b**

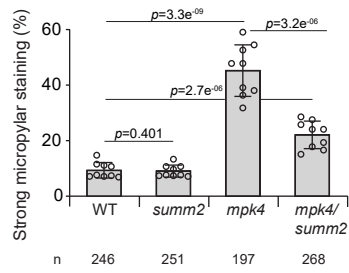

**c** 48 hours after fertilisation

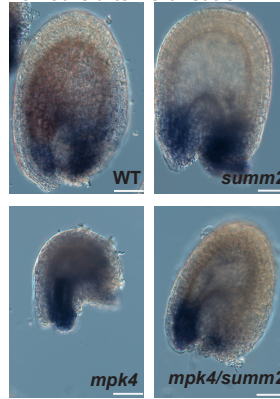

**d**

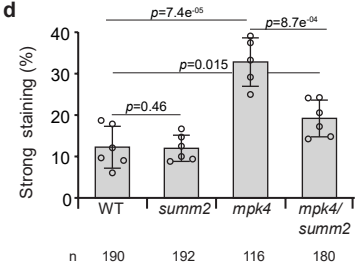

**e** FG4-FG5

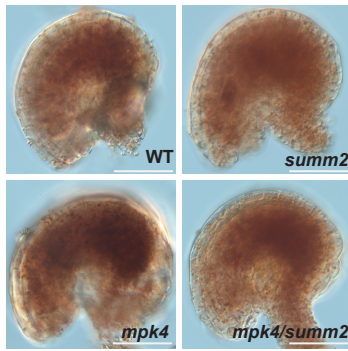

**f**

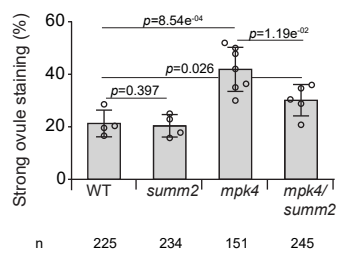

**g** 48 hours after fertilisation

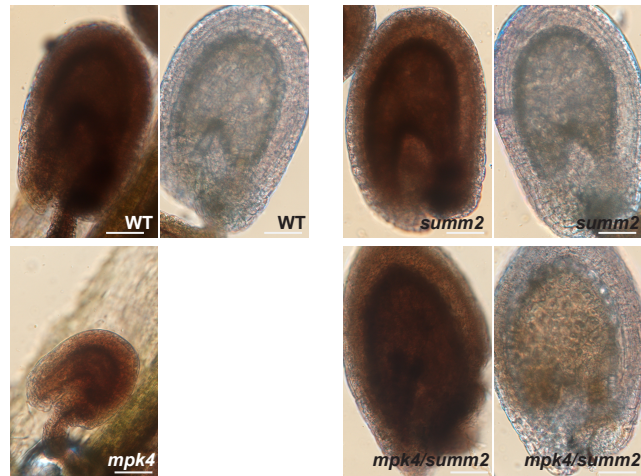

Supplementary Figure 2

**Supplementary Figure 2. Analysis of reactive-oxygen species levels before and after fertilization**  
**a-g** NBT-staining (a-d) and DAB staining (e-g) at the FG4-FG5 developmental stage and 48 hours after fertilization. Depicted are the results and representative images of three biological replicates. Statistical significance was analyzed by one-way ANOVA. Error bars show  $\pm$  SD. Source data and further statistical analysis are provided in the source data file. Scale bars, 30  $\mu$ m.

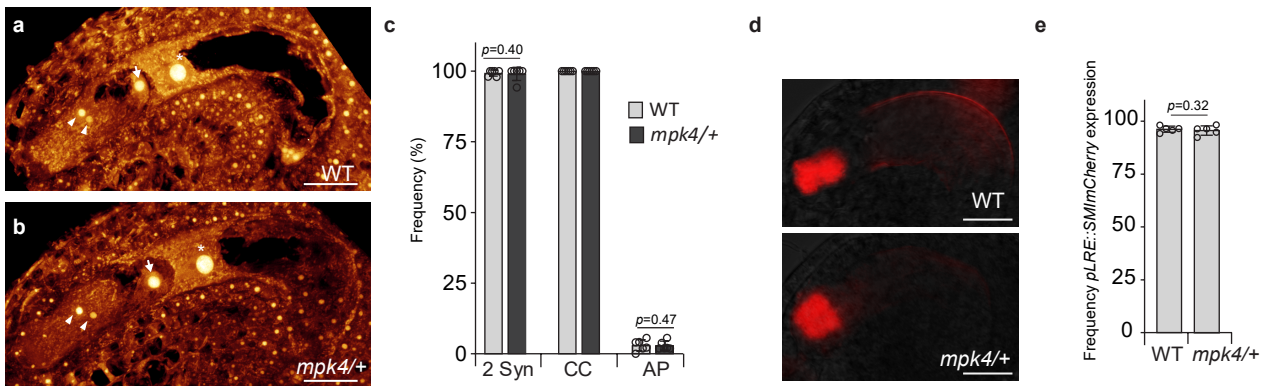

**f** *mpk4-2* transmission efficiency

|              |           | determined |                 |                      | expected |                     |                      |
|--------------|-----------|------------|-----------------|----------------------|----------|---------------------|----------------------|
| Transmission | cross     | +/+        | <i>mpk4-2/+</i> | <i>mpk4-2/mpk4-2</i> | +/+ (%)  | <i>mpk4-2/+</i> (%) | <i>mpk4-2/mpk4-2</i> |
| selfed       | -/+ x -/+ | 91 (28.4%) | 171 (53.5%)     | 58 (18.1%)           | 25.0     | 50.0                | 25.0                 |

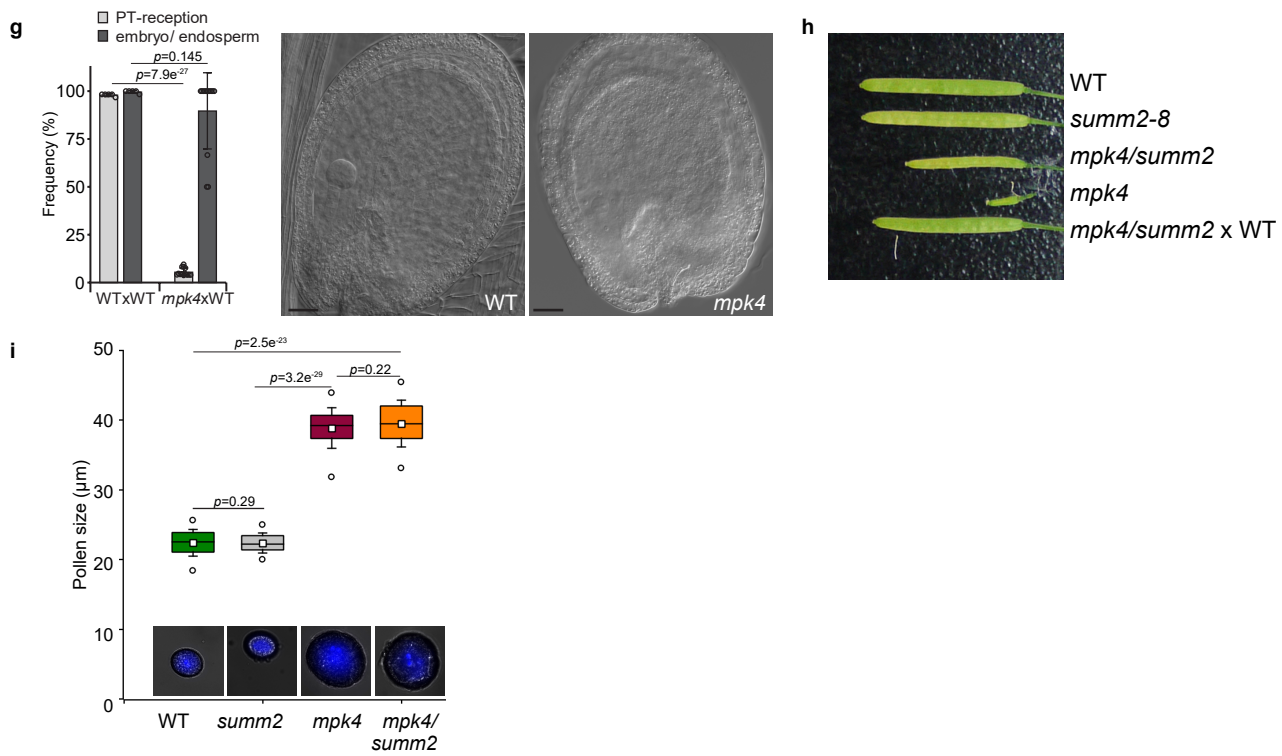

Supplementary Figure 3

**Supplementary Figure 3. Characterization of the heterozygote *mpk4* mutant**

**a-c** The occurrence of synergids, central cell and antipodals in WT (n=298) and *mpk4/+* (n=304), see also **Supplementary movies 7-8**. Depicted are the results and representative images of three biological replicates. Error bars show  $\pm$  SD. Scale bars, 30  $\mu$ m.

**d-e** The expression of the *pLRE::SM1-mCherryGolgi* reporter in the synergids in WT (n=268) and *mpk4/+* (n=279). Depicted are the results and representative images of three biological replicates. Error bars show  $\pm$  SD. Scale bars, 20  $\mu$ m.

**f** Transmission efficiency of the self-crossed heterozygote *mpk4* mutant.

**g** Frequency of embryo/endosperm formation in WT (n=302) and *mpk4/-* (n=304) after the reception of WT-pollen tubes. Three biological replicates analyzed. Error bars show  $\pm$  SD. Scale bars, 30  $\mu$ m.

**h** Representative siliques of WT, *summ2-8*, *mpk4/summ2*, *mpk4*, and *mpk4/summ2* pollinated with WT pollen.

**i** Pollen size of WT, *summ2*, *mpk4/summ2*, and *mpk4*. Boxes represent the 25th and 75th percentiles, and the inner rectangle highlights the median, whiskers show the SD, and outliers are depicted by dots (Min/max range). Statistical significance was analyzed by one-way ANOVA. Analyzed were three biological replicates. Source data and further statistical analysis are provided in the source data file.

Supplementary Table 1

| <b>Prior used in this study:</b> |                                |                                                                                         |
|----------------------------------|--------------------------------|-----------------------------------------------------------------------------------------|
| mpk4-LP                          | GTGACAATGCAAGAAGATACGTTAGACAGC | Genotyping <i>mpk4-2</i>                                                                |
| mpk4-RP                          | CTTGAAATATCTACAGAGTTGGTGTG     | Genotyping <i>mpk4-2</i>                                                                |
| LBb1                             | ATTTTGCCGATTTCCGGAAC           | T-DNA, genotyping <i>mpk4-2</i>                                                         |
| 91s                              | TTTCTGTATCAGTTGTTGCGTG         | Genotyping <i>mpk4-3</i> , base pair exchange determination by sequencing: GaGGATTTCGGG |
| 91as                             | TCTAACGTATCTTCTTGCATTGTC       | Genotyping <i>mpk4-3</i> , GaGGATTTCGGG                                                 |
| LB3                              | atctgaattcataaccaatctcgatacac  | T-DNA, genotyping <i>summ2-8</i>                                                        |
| 90s                              | ATGGGAGCTTGTTTAACTCTCG         | Genotyping <i>summ2-8</i>                                                               |
| 87as                             | CCAATGGAAGCTTTCTCAGC           | Genotyping <i>summ2-8</i>                                                               |
